# Supplementary material for: Lytic polysaccharide monooxygenase (LPMO) expression in Arabidopsis reduces cell wall recalcitrance and boosts immunity against Pseudomonas syringae.
Source: Research Square preprint supplement (doi:10.21203/rs.3.rs-8657892/v1), 2026-02-24
Supplement: Supplementary file 2 [file bc82e3dc62ad41ea5553b665.docx]

| **Primer name**  **Supplementary Table 1: Primer list** | **Target Gene ID** | **Name of gene / vector** | **Sequence (5’-3’)** |
| --- | --- | --- | --- |
|
| **M13 forward and M13 reverse primers** | | | |
| PCWL-346_F |  | pUC57 | GTAAAACGACGGCCA |
| PCWL-347_R |  | pUC57 | CAGGAAACAGCTATGAC |
| **Vector specific primers** | | | |
| PCWL- 494_F | - | pCC0996 | CACTCACACACACGCAATCA |
| PCWL- 495_F | - | pCC0995 | ACAGTGGTCCCAAAGATGGA |
| **qPCR primers** | | | |
| PCWL-127_F | *ACTIN2* | *ACTIN2* | TGCTGGATTCTGGTGATGGT |
| PCWL-128_R | *ACTIN2* | *ACTIN2* | AATTTCCCGCTCTGCTGTTG |
| PCWL-456_F | *PcAA14* | *PcAA14* | CTCAAAATGATATTTTCGTTGAT |
| PCWL-457_R | *PcAA14* | *PcAA14* | GAAGTAGATGTTGTAGAAGCTGT |
| PCWL-381_F | *PAL1* | *PAL1* | GCGATTCACGGTGGTAACTT |
| PCWL-382_R | *PAL1* | *PAL1* | CCAAACTTGGATTCCTCGAA |
| PCWL-395_F | *PAL2* | *PAL2* | TGTCCAACGGTGAGACTGAG |
| PCWL-396_R | *PAL2* | *PAL2* | CAAGCTCTTCCCTCACGAAC |
| PCWL-564_F | *PAL3* | *PAL3* | TAGCTTTGTGCCAAGCCTTT |
| PCWL-565_R | *PAL3* | *PAL3* | AAGACGTATTCGCGGTTGAC |
| PCWL-776_F | *C4H* | *C4H* | ACCGAGCCTGATCTTCACAA |
| PCWL-777_R | *C4H* | *C4H* | GGTTGTTTGCTAGCCACCAA |
| PCWL-389_F | *CAD1* | *CAD1* | TGTGGAAAACGAGTGCATGT |
| PCWL-390_R | *CAD1* | *CAD1* | CCCAGGAACCAAAGGGTACT |
| PCWL-387_F | *CAD4* | *CAD4* | AGACTCGCAGATTCCCTTGA |
| PCWL-388_R | *CAD4* | *CAD4* | CTCCCAAGAATGACGAGAGG |
| PCWL-385_F | *CAD5* | *CAD5* | ACCCATCTGGGATCCTCTCT |
| PCWL-386_R | *CAD5* | *CAD5* | CATCTGATCCCACCTCCACT |
| PCWL-391_F | *CCR1* | *CCR1* | TATGTGGATGTTCGCGATGT |
| PCWL-392_R | *CCR1* | *CCR1* | GGCTTGGCTCTAGGGTTCTT |
| PCWL-768_F | *4CL1* | *4CL1* | CCAAATCGCCGCCAATTTTC |
| PCWL-769_R | *4CL1* | *4CL1* | CGTCGTCGTTTTGAAGTGGT |
| PCWL-774_F | *4CL3* | *4CL3* | TGAACGATCCAGAAGCCACT |
| PCWL-775_R | *4CL3* | *4CL3* | TCCCCAGCGACTTCATCATT |
| PCWL-770_F | *4CL5* | *4CL5* | TCCTCCGGTGGTTTTAGCAT |
| PCWL-771_R | *4CL5* | *4CL5* | GATCACAGTCCCACATGCAC |
| PCWL-383_F | *F5H* | *F5H* | ATGATGGGGATGTTGTCGAT |
| PCWL-384_R | *F5H* | *F5H* | ACTCCGTTAAGGCCCACTCT |
| PCWL-163_F | *MYB46* | *MYB46* | TTCGCTTTCATTCCATCCTC |
| PCWL-164_R | *MYB46* | *MYB46* | AGAGGAATCGCTTGCTGTGT |
| PCWL-393_F | *MYB58* | *MYB58* | TTGTTGAGGTGTGGCAAGAG |
| PCWL-394_R | *MYB58* | *MYB58* | TCTGTTCTTCCAGGCAGCTT |
| PCWL-560_F | *MYB63* | *MYB63* | TCTCTCCCCAAACAATCTGG |
| PCWL-561_R | *MYB63* | *MYB63* | AAGCGATTTTCGACCACTTG |
| PCWL-786_F | *C3H* | *C3H* | TCCCGCTTACCTTACTTGCA |
| PCWL-787_R | *C3H* | *C3H* | TTTTCCATACAGCCGGGTCT |

F - Forward primer, R - Reverse primer
